# Supplementary material for: Author Correction: Mobilise-D insights to estimate real-world walking speed in multiple conditions with a wearable device
Source: PubMed Central journal article supplement (PMC11582556; doi:10.1038/s41598-024-79454-4), 2024-11-21
Supplement: 41598_2024_79454_MOESM1_ESM.pdf [file 41598_2024_79454_MOESM1_ESM.pdf]

## Supplementary material

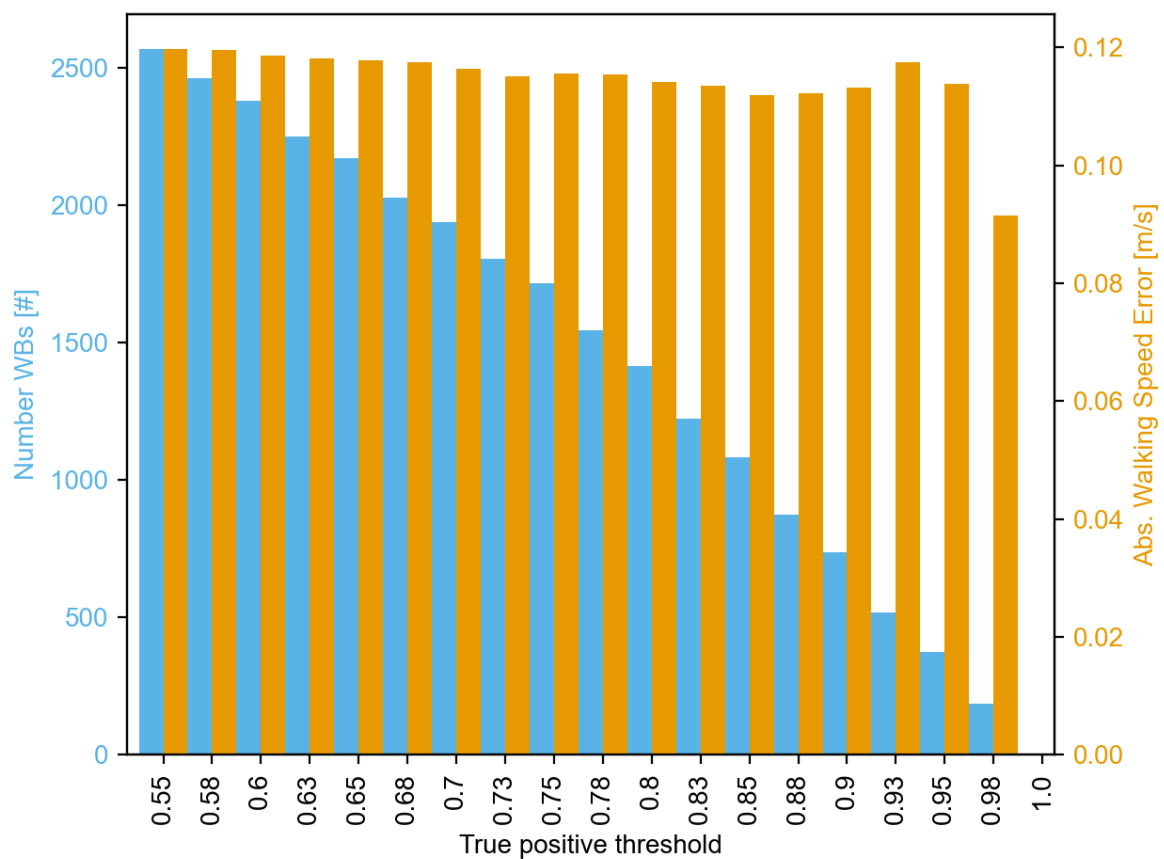

**Supplementary Figure 1.** Effect of selection of the threshold for identification of true-positive walking bouts (i.e. overlapping between walking bouts correctly identified by the wearable device and reference system) on the number of real-world walking bouts (WBs) detected as true-positive and included in analysis and the average absolute gait speed error across them.

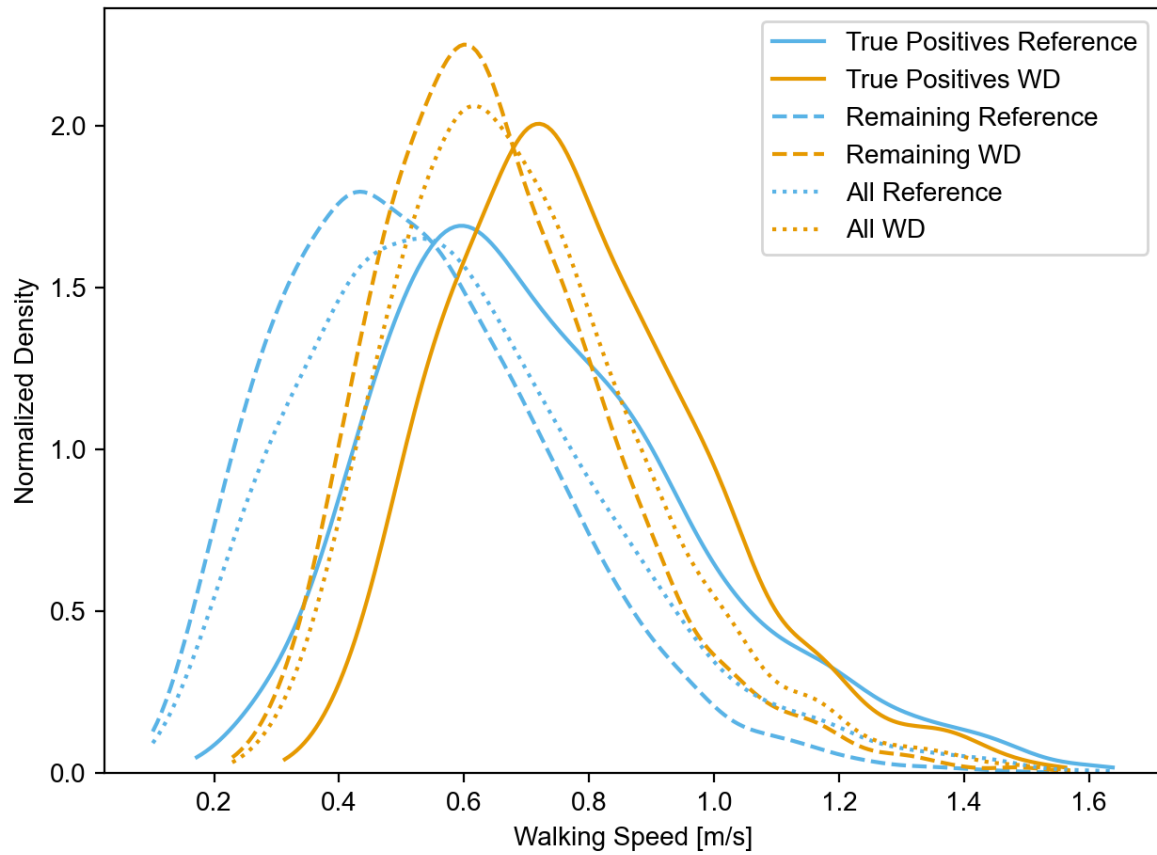

**Supplementary Figure 2.** Gait speed distributions overall considering all walking bouts (WBs) walking bouts, only true-positive walking bouts, and only false positive walking bouts. Comparing the reference system to the wearable device (WD). Each kernel density estimation is normalised to an area of 1 independently.

**Supplementary Table 1.** Results from the analysis only considering true positive walking bouts for cadence.

|            | Cohort | Reference [steps/min] | Wearable device [steps/min] | Error with LOA [steps/min] | Rel. Error with LOA [%] | Abs Error [steps/min] | Rel. Abs. Error [%] | ICC               |
|------------|--------|-----------------------|-----------------------------|----------------------------|-------------------------|-----------------------|---------------------|-------------------|
| Laboratory | CHF    | 99.13 [ 78.69 124.18] | 95.78 [ 77.49 120.02]       | 3.35 [ -7.69 14.38]        | 3.00 [ -8.14 14.14]     | 4.33 [ 0.37 15.18]    | 4.27 [ 0.39 13.18]  | 0.90 [0.85, 0.94] |
|            | COPD   | 97.88 [ 75.53 116.11] | 94.94 [ 73.57 110.66]       | 2.95 [ -3.57 9.46]         | 2.89 [ -3.34 9.12]      | 3.38 [ 0.33 9.48]     | 3.38 [ 0.36 8.60]   | 0.93 [0.90, 0.95] |
|            | HA     | 99.32 [ 74.96 117.23] | 94.81 [ 74.62 110.52]       | 4.51 [ -6.59 15.60]        | 4.28 [ -6.08 14.64]     | 4.94 [ 0.33 14.36]    | 4.77 [ 0.41 14.43]  | 0.81 [0.73, 0.87] |
|            | MS     | 94.64 [ 66.17 116.06] | 93.86 [ 67.77 113.95]       | 0.78 [-15.69 17.25]        | 0.24 [-16.03 16.50]     | 4.04 [ 0.14 12.68]    | 4.27 [ 0.15 13.75]  | 0.83 [0.77, 0.87] |
|            | PD     | 92.86 [ 68.62 115.40] | 92.77 [ 71.24 109.90]       | 0.09 [ -9.02 9.20]         | -0.22 [-10.77 10.34]    | 3.38 [ 0.30 10.27]    | 3.76 [ 0.34 10.13]  | 0.93 [0.90, 0.95] |
|            | PFF    | 96.64 [ 69.81 122.09] | 95.73 [ 70.75 114.29]       | 0.92 [-14.68 16.51]        | 0.17 [-16.79 17.13]     | 3.97 [ 0.20 10.93]    | 4.08 [ 0.22 11.52]  | 0.85 [0.79, 0.89] |
|            | All    | 96.23 [ 70.44 118.73] | 94.45 [ 71.24 113.76]       | 1.78 [-11.20 14.76]        | 1.39 [-11.99 14.77]     | 3.96 [ 0.24 11.48]    | 4.08 [ 0.24 12.70]  | 0.87 [0.85, 0.89] |
| Real-world | CHF    | 98.76 [ 75.34 121.84] | 98.04 [ 76.99 123.03]       | 0.73 [-13.99 15.44]        | 0.42 [-13.64 14.48]     | 4.22 [ 0.10 15.56]    | 4.18 [ 0.11 17.34]  | 0.87 [0.82, 0.90] |
|            | COPD   | 87.45 [ 71.59 104.46] | 85.53 [ 72.73 99.86]        | 1.92 [-10.32 14.17]        | 1.82 [-11.95 15.59]     | 4.32 [ 0.21 12.81]    | 4.91 [ 0.27 14.40]  | 0.77 [0.72, 0.81] |
|            | HA     | 91.86 [ 71.46 114.15] | 89.97 [ 72.21 111.61]       | 1.89 [-10.45 14.23]        | 1.59 [-11.76 14.95]     | 4.35 [ 0.22 14.39]    | 4.73 [ 0.23 16.73]  | 0.87 [0.84, 0.89] |
|            | MS     | 88.29 [ 62.03 109.10] | 89.66 [ 66.78 108.42]       | -1.36 [-13.91 11.18]       | -2.45 [-20.68 15.77]    | 4.23 [ 0.20 12.52]    | 5.38 [ 0.19 19.11]  | 0.88 [0.85, 0.91] |
|            | PD     | 92.66 [ 67.85 111.56] | 93.67 [ 76.86 109.11]       | -1.01 [-13.70 11.67]       | -1.77 [-17.73 14.19]    | 3.80 [ 0.11 16.28]    | 4.56 [ 0.11 22.21]  | 0.84 [0.80, 0.88] |
|            | PFF    | 89.63 [ 64.31 113.62] | 88.59 [ 65.79 110.87]       | 1.04 [-18.32 20.40]        | 0.37 [-17.93 18.67]     | 5.17 [ 0.14 16.74]    | 5.40 [ 0.16 19.14]  | 0.77 [0.70, 0.83] |
|            | All    | 91.04 [ 69.61 113.92] | 90.22 [ 71.27 111.23]       | 0.81 [-13.07 14.70]        | 0.35 [-15.21 15.90]     | 4.33 [ 0.14 14.93]    | 4.85 [ 0.16 17.18]  | 0.85 [0.83, 0.86] |

**Supplementary Table 2.** Results from the analysis only considering true positive walking bouts for stride length.

|            | Cohort | Reference [m]     | Wearable device [m] | Error with LOA [m]  | Rel. Error with LOA [%] | Abs Error [m]     | Rel. Abs. Error [%] | ICC               |
|------------|--------|-------------------|---------------------|---------------------|-------------------------|-------------------|---------------------|-------------------|
| Laboratory | CHF    | 1.12 [0.68, 1.53] | 1.08 [0.82, 1.43]   | -0.03 [-0.36, 0.29] | -0.34 [-34.33, 33.64]   | 0.12 [0.01, 0.36] | 11.96 [0.85, 34.36] | 0.72 [0.57, 0.82] |
|            | COPD   | 1.08 [0.82, 1.30] | 1.12 [0.87, 1.39]   | 0.04 [-0.16, 0.24]  | 4.90 [-21.18, 30.98]    | 0.08 [0.01, 0.21] | 8.50 [0.78, 22.49]  | 0.78 [0.69, 0.84] |
|            | HA     | 1.04 [0.74, 1.28] | 1.07 [0.76, 1.35]   | 0.03 [-0.23, 0.29]  | 4.17 [-26.87, 35.21]    | 0.10 [0.01, 0.25] | 10.84 [0.77, 29.49] | 0.72 [0.61, 0.80] |
|            | MS     | 1.04 [0.70, 1.36] | 1.08 [0.83, 1.39]   | 0.05 [-0.29, 0.38]  | 7.13 [-34.06, 48.31]    | 0.14 [0.01, 0.35] | 15.11 [0.96, 46.39] | 0.58 [0.47, 0.67] |
|            | PD     | 1.02 [0.65, 1.35] | 1.06 [0.81, 1.37]   | 0.04 [-0.30, 0.38]  | 7.71 [-47.94, 63.36]    | 0.13 [0.01, 0.32] | 16.05 [1.24, 40.23] | 0.65 [0.53, 0.73] |
|            | PFF    | 0.86 [0.47, 1.38] | 0.93 [0.70, 1.34]   | 0.06 [-0.24, 0.37]  | 14.70 [-48.91, 78.32]   | 0.13 [0.01, 0.33] | 20.51 [0.90, 64.43] | 0.76 [0.67, 0.82] |
|            | All    | 1.02 [0.61, 1.37] | 1.06 [0.76, 1.37]   | 0.04 [-0.27, 0.34]  | 7.13 [-38.87, 53.14]    | 0.12 [0.01, 0.33] | 14.31 [0.86, 42.72] | 0.72 [0.68, 0.75] |
| Real-world | CHF    | 1.14 [0.65, 1.67] | 1.12 [0.80, 1.60]   | -0.02 [-0.42, 0.37] | 2.33 [-49.75, 54.42]    | 0.15 [0.02, 0.41] | 15.91 [1.39, 71.58] | 0.74 [0.67, 0.80] |
|            | COPD   | 0.88 [0.55, 1.25] | 1.05 [0.78, 1.37]   | 0.16 [-0.20, 0.53]  | 23.65 [-40.08, 87.38]   | 0.18 [0.01, 0.54] | 25.37 [1.35, 91.30] | 0.31 [0.21, 0.41] |
|            | HA     | 0.92 [0.57, 1.34] | 0.99 [0.68, 1.37]   | 0.08 [-0.22, 0.38]  | 11.70 [-37.30, 60.71]   | 0.12 [0.01, 0.38] | 15.88 [1.05, 56.66] | 0.74 [0.69, 0.78] |
|            | MS     | 0.91 [0.58, 1.33] | 1.02 [0.77, 1.37]   | 0.11 [-0.30, 0.51]  | 17.09 [-50.14, 84.33]   | 0.16 [0.01, 0.50] | 21.59 [1.08, 79.37] | 0.41 [0.28, 0.52] |
|            | PD     | 0.97 [0.53, 1.42] | 1.07 [0.70, 1.46]   | 0.09 [-0.33, 0.51]  | 15.57 [-53.96, 85.09]   | 0.16 [0.01, 0.51] | 21.38 [0.76, 71.32] | 0.53 [0.43, 0.63] |
|            | PFF    | 0.88 [0.55, 1.24] | 0.94 [0.72, 1.19]   | 0.05 [-0.33, 0.44]  | 11.61 [-49.74, 72.96]   | 0.15 [0.01, 0.41] | 20.52 [1.38, 70.04] | 0.42 [0.29, 0.54] |
|            | All    | 0.94 [0.56, 1.38] | 1.03 [0.73, 1.41]   | 0.09 [-0.30, 0.47]  | 14.60 [-46.65, 75.84]   | 0.15 [0.01, 0.48] | 20.15 [1.08, 75.90] | 0.59 [0.55, 0.62] |
